# Supplementary material for: Uncovering the Salt Response of Soybean by Unraveling Its Wild and Cultivated Functional Genomes Using Tag Sequencing
Source: PLoS One. 2012 Nov 28;7(11):e48819. doi: 10.1371/journal.pone.0048819 (PMC3509101; doi:10.1371/journal.pone.0048819)
Supplement: Table S5 — Cellular component classification of salt responsive genes. (XLS) [file pone.0048819.s010.xls]

## Sheet: GO C
Table S5: Celluar component classification of salt responsive genes.
The percentage of genes involved in each cellular component was shown in parenthesis.
Terms from the Component Ontology with p-value as good or better than 1
	Glycine Soja			Glycine max
Gene Ontology term	Cluster frequency, out of 174 genes	Genome frequency of use, out of 4791 genes	Corrected P-value	Cluster frequency, out of 585 genes	Genome frequency of use, out of 4181 genes	Corrected P-value
Glycine soja specific GO component
ATP-binding cassette (ABC) transporter complex	2 (1.1)	6 (0.1)	1
cell projection	2 (1.1)	3 (0.1)	0.24965
flagellum	2 (1.1)	3 (0.1)	0.24965
Glycine max specific GO component
cell fraction				2 (0.3)	3 (0.1)	1
coated vesicle				2 (0.3)	6 (0.1)	1
coated vesicle membrane				2 (0.3)	6 (0.1)	1
COPI coated vesicle membrane				2 (0.3)	3 (0.1)	1
COPI vesicle coat				2 (0.3)	3 (0.1)	1
COPI-coated vesicle				2 (0.3)	3 (0.1)	1
cytoplasmic vesicle membrane				2 (0.3)	6 (0.1)	1
cytoplasmic vesicle part				2 (0.3)	7 (0.2)	1
cytosol				9 (1.5)	59 (1.4)	1
cytosolic part				4 (0.7)	11 (0.3)	1
cytosolic ribosome				3 (0.5)	9 (0.2)	1
cytosolic small ribosomal subunit				2 (0.3)	6 (0.1)	1
endomembrane system				6 (1.0)	28 (0.7)	1
endoplasmic reticulum				7 (1.2)	36 (0.9)	1
endoplasmic reticulum lumen				2 (0.3)	2 (0.0)	1
endoplasmic reticulum membrane				4 (0.7)	12 (0.3)	1
endoplasmic reticulum part				4 (0.7)	12 (0.3)	1
eukaryotic translation elongation factor 1 complex				4 (0.7)	8 (0.2)	1
glyoxysome				2 (0.3)	9 (0.2)	1
Golgi apparatus part				3 (0.5)	14 (0.3)	1
Golgi membrane				2 (0.3)	10 (0.2)	1
Golgi-associated vesicle				2 (0.3)	6 (0.1)	1
Golgi-associated vesicle membrane				2 (0.3)	6 (0.1)	1
insoluble fraction				2 (0.3)	3 (0.1)	1
intracellular organelle lumen				6 (1.0)	21 (0.5)	1
large ribosomal subunit				3 (0.5)	11 (0.3)	1
membrane fraction				2 (0.3)	3 (0.1)	1
membrane-enclosed lumen				7 (1.2)	23 (0.6)	1
microbody				6 (1.0)	18 (0.4)	1
mitochondrial membrane part				3 (0.5)	16 (0.4)	1
mitochondrial proton-transporting ATP synthase complex				2 (0.3)	5 (0.1)	1
mitochondrial proton-transporting ATP synthase complex, catalytic core F(1)				2 (0.3)	3 (0.1)	1
nuclear envelope-endoplasmic reticulum network				4 (0.7)	12 (0.3)	1
nuclear lumen				3 (0.5)	14 (0.3)	1
nuclear part				3 (0.5)	28 (0.7)	1
nucleoplasm				2 (0.3)	10 (0.2)	1
nucleoplasm part				2 (0.3)	10 (0.2)	1
organelle lumen				6 (1.0)	21 (0.5)	1
peroxisome				6 (1.0)	15 (0.4)	1
photosystem				4 (0.7)	13 (0.3)	1
photosystem I				2 (0.3)	7 (0.2)	1
photosystem II				2 (0.3)	7 (0.2)	1
plant-type cell wall				2 (0.3)	8 (0.2)	1
plasma membrane				13 (2.2)	58 (1.4)	1
proteasome complex				3 (0.5)	8 (0.2)	1
proteasome core complex				3 (0.5)	8 (0.2)	1
proton-transporting ATP synthase complex				2 (0.3)	15 (0.4)	1
proton-transporting ATP synthase complex, catalytic core F(1)				2 (0.3)	9 (0.2)	1
proton-transporting two-sector ATPase complex				4 (0.7)	21 (0.5)	1
proton-transporting two-sector ATPase complex, catalytic domain				2 (0.3)	9 (0.2)	1
ribosomal subunit				8 (1.4)	27 (0.6)	1
small ribosomal subunit				5 (0.9)	16 (0.4)	1
vacuole				4 (0.7)	19 (0.5)	1
vesicle coat				2 (0.3)	6 (0.1)	1
vesicle membrane				2 (0.3)	6 (0.1)	1
GO process common in two species
apoplast	3 (1.7)	24 (0.5)	1	9 (1.5)	20 (0.5)	0.0899
cell	172 (98.9)	4755 (99.2)	1	579 (99.0)	4148 (99.2)	1
cell part	172 (98.9)	4755 (99.2)	1	579 (99.0)	4148 (99.2)	1
cell wall	2 (1.1)	37 (0.8)	1	10 (1.7)	27 (0.6)	0.2786
chloroplast	8 (4.6)	203 (4.2)	1	19 (3.2)	170 (4.1)	1
chloroplast part	2 (1.1)	33 (0.7)	1	3 (0.5)	28 (0.7)	1
chloroplast stroma	2 (1.1)	18 (0.4)	1	3 (0.5)	15 (0.4)	1
chromatin	4 (2.3)	60 (1.3)	1	7 (1.2)	48 (1.1)	1
chromosomal part	4 (2.3)	65 (1.4)	1	7 (1.2)	53 (1.3)	1
chromosome	4 (2.3)	87 (1.8)	1	7 (1.2)	76 (1.8)	1
coated membrane	2 (1.1)	11 (0.2)	1	4 (0.7)	12 (0.3)	1
cytoplasm	125 (71.8)	3615 (75.5)	1	449 (76.8)	3103 (74.2)	1
cytoplasmic membrane-bounded vesicle	42 (24.1)	977 (20.4)	1	130 (22.2)	841 (20.1)	1
cytoplasmic part	121 (69.5)	3473 (72.5)	1	427 (73.0)	2985 (71.4)	1
cytoplasmic vesicle	42 (24.1)	984 (20.5)	1	130 (22.2)	848 (20.3)	1
cytoskeletal part	4 (2.3)	47 (1.0)	1	6 (1.0)	40 (1.0)	1
cytoskeleton	4 (2.3)	66 (1.4)	1	7 (1.2)	59 (1.4)	1
envelope	2 (1.1)	77 (1.6)	1	12 (2.1)	63 (1.5)	1
external encapsulating structure	2 (1.1)	38 (0.8)	1	10 (1.7)	28 (0.7)	0.38017
extracellular region	4 (2.3)	69 (1.4)	1	15 (2.6)	57 (1.4)	1
Golgi apparatus	3 (1.7)	26 (0.5)	1	6 (1.0)	25 (0.6)	1
integral to membrane	10 (5.7)	166 (3.5)	1	31 (5.3)	154 (3.7)	1
intracellular	141 (81.0)	4065 (84.8)	1	492 (84.1)	3525 (84.3)	1
intracellular membrane-bounded organelle	123 (70.7)	3638 (75.9)	1	421 (72.0)	3167 (75.7)	1
intracellular non-membrane-bounded organelle	16 (9.2)	316 (6.6)	1	47 (8.0)	243 (5.8)	1
intracellular organelle	135 (77.6)	3828 (79.9)	1	454 (77.6)	3311 (79.2)	1
intracellular organelle part	15 (8.6)	315 (6.6)	1	48 (8.2)	267 (6.4)	1
intracellular part	140 (80.5)	4012 (83.7)	1	488 (83.4)	3477 (83.2)	1
intrinsic to membrane	10 (5.7)	170 (3.5)	1	31 (5.3)	157 (3.8)	1
macromolecular complex	24 (13.8)	469 (9.8)	1	79 (13.5)	352 (8.4)	0.00055
membrane	43 (24.7)	1108 (23.1)	1	141 (24.1)	959 (22.9)	1
membrane coat	2 (1.1)	11 (0.2)	1	4 (0.7)	12 (0.3)	1
membrane part	15 (8.6)	244 (5.1)	1	44 (7.5)	220 (5.3)	0.85489
membrane-bounded organelle	124 (71.3)	3641 (76.0)	1	422 (72.1)	3170 (75.8)	1
membrane-bounded vesicle	42 (24.1)	977 (20.4)	1	130 (22.2)	841 (20.1)	1
microtubule	4 (2.3)	42 (0.9)	1	5 (0.9)	33 (0.8)	1
microtubule cytoskeleton	4 (2.3)	47 (1.0)	1	5 (0.9)	38 (0.9)	1
mitochondrial envelope	2 (1.1)	55 (1.1)	1	11 (1.9)	44 (1.1)	1
mitochondrial inner membrane	2 (1.1)	47 (1.0)	1	8 (1.4)	38 (0.9)	1
mitochondrial membrane	2 (1.1)	48 (1.0)	1	8 (1.4)	38 (0.9)	1
mitochondrial part	2 (1.1)	59 (1.2)	1	12 (2.1)	50 (1.2)	1
mitochondrion	31 (17.8)	935 (19.5)	1	123 (21.0)	801 (19.2)	1
non-membrane-bounded organelle	16 (9.2)	316 (6.6)	1	47 (8.0)	243 (5.8)	1
nucleosome	4 (2.3)	55 (1.1)	1	7 (1.2)	42 (1.0)	1
nucleus	12 (6.9)	362 (7.6)	1	38 (6.5)	361 (8.6)	1
organelle	135 (77.6)	3830 (79.9)	1	454 (77.6)	3313 (79.2)	1
organelle envelope	2 (1.1)	76 (1.6)	1	12 (2.1)	62 (1.5)	1
organelle inner membrane	2 (1.1)	50 (1.0)	1	8 (1.4)	41 (1.0)	1
organelle membrane	6 (3.4)	110 (2.3)	1	16 (2.7)	92 (2.2)	1
organelle part	15 (8.6)	317 (6.6)	1	48 (8.2)	269 (6.4)	1
photosynthetic membrane	3 (1.7)	36 (0.8)	1	5 (0.9)	29 (0.7)	1
plastid	43 (24.7)	1422 (29.7)	1	136 (23.2)	1214 (29.0)	1
plastid part	2 (1.1)	43 (0.9)	1	3 (0.5)	38 (0.9)	1
plastid stroma	2 (1.1)	18 (0.4)	1	3 (0.5)	15 (0.4)	1
protein complex	12 (6.9)	227 (4.7)	1	38 (6.5)	185 (4.4)	0.92394
protein-DNA complex	4 (2.3)	56 (1.2)	1	7 (1.2)	43 (1.0)	1
ribonucleoprotein complex	8 (4.6)	186 (3.9)	1	34 (5.8)	125 (3.0)	0.00716
ribosome	8 (4.6)	163 (3.4)	1	32 (5.5)	105 (2.5)	0.00095
thylakoid	4 (2.3)	66 (1.4)	1	5 (0.9)	54 (1.3)	1
thylakoid membrane	3 (1.7)	21 (0.4)	1	2 (0.3)	18 (0.4)	1
thylakoid part	3 (1.7)	24 (0.5)	1	3 (0.5)	21 (0.5)	1
vesicle	42 (24.1)	984 (20.5)	1	130 (22.2)	848 (20.3)	1
